# Supplementary material for: Research on quality control and reliability evaluation method of the Real-Time Water Pressure Detection System
Source: Research Square preprint supplement (doi:10.21203/rs.3.rs-8597051/v1), 2026-02-09
Supplement: Supplementary file 1 [file c24baa388c18028fa16f5e8d.docx]

**Summary of Raw Data**: Research on quality control and reliability evaluation method of the Real-Time Water Pressure Detection System

**Paper Title**：Research on quality control and reliability evaluation method of the Real-Time Water Pressure Detection System

**Authors**：Yan Peng1, Chao Guo2 ，Yixuan Cao3

**Affiliation**：Department of Architectural Engineering, Shaanxi A&F Technology University, Yangling, Shaanxi Province, 712100, China

**Funding**：Shaanxi A&F Technology University Natural Science Research Fund (ZK-06)

**I. Data Overview**

Data Sources

(1) Actual Operation Data: Long-term monitoring data of the real-time water pressure detection system for the water supply pipe network in Xianyang City, Shaanxi Province (including a complete water supply chain such as water sources, pumping stations, pipelines, and valves). The monitoring period is 12 months, covering May 2024 - April 2025, including the normal water period, dry season, flood season, and peak water usage periods during holidays.

(2) Simulated Experiment Data: Fault simulation test data from a simulated water supply system built in the laboratory (artificially triggered typical fault scenarios such as sensor failure and data transmission interruption). A total of 200 test samples are included, covering 4 categories of typical faults: sensor failure, data transmission interruption, valve failure, and pumping station abnormality. Each type of fault was tested repeatedly for more than 10 times.

Data Types: Original records of system performance parameters, equipment fault logs, and original values of indicator calculations (core raw data without derivative processing).

Data Purpose

To support the core conclusions of the paper: verify the "improvement effect of quality control methods on the data quality of the system" and the "scientificity of reliability evaluation methods and their improvement effect on system stability".

**II. Raw Comparative Data Before and After the Implementation of Quality Control Methods**

| Indicator Items | Unit | Raw Data Before Implementation | Raw Data After Implementation | Change Magnitude | Data Description |
| --- | --- | --- | --- | --- | --- |
| Sensor Accuracy | % | 94.5 | 98.3 | Increased by 3.8% | Consistency between sensor measurements and true values |
| Data Transmission Rate | kbps | 120.2 | 156.4 | Increased by 30.1% | Transmission rate of data from sensors to the monitoring platform |
| System Response Time | ms | 250.0 | 187.5 | Reduced by 25.0% | Delay from the system receiving commands to returning results |
| Noise Data Proportion | % | 5.2 | 1.3 | Decreased by 75.0% | Proportion of invalid noise data caused by environmental interference |
| Abnormal Data Proportion | % | 3.1 | 0.8 | Decreased by 74.2% | Proportion of abnormal data exceeding the normal water pressure threshold |

**Note**: Corresponds to Table 2 in the paper; this is the core raw data directly measured during actual operation.

**III. Raw Comparative Data Before and After the Implementation of Reliability Evaluation Methods**

1.Quantitative Statistical Raw Data

| Indicator Items | Unit Raw | Data Before Implementation | Raw Data After Implementation | Change Magnitude | Data Description |
| --- | --- | --- | --- | --- | --- |
| System Reliability | % | 92.4 | 96.7 | Increased by 4.3 percentage points | The probability that the system completes the specified function within the specified time |
| Failure Rate | times/hour | 0.032 | 0.018 | Decreased by 0.014 times/hour | The average frequency of system failures occurring per unit time |

**Note**: Corresponds to Table 3 in the paper; core indicators calculated based on actual operation and fault simulation data.

2. Trend-Based Raw Statistical Data

| Indicator Items | Historical Data Fluctuation Range | Post-Implementation Data Fluctuation Range | Core Change Trend | Data Description |
| --- | --- | --- | --- | --- |
| Mean Time Between Failures（MTBF） | 100 - 130 | 120 - 145 | Overall Significant Increase | Average operating time between two consecutive faults |
| Mean Time To Repair（MTTR） | 5 - 6.5 | 3 - 4.3 | Overall Significant Decrease | Average time from fault detection to system recovery to normal operation |

**Note**: Corresponds to Figure 2 in the paper; these are raw statistical results from multi-cycle monitoring, with all units in "hours".

**IV. Explanation of Data Collection and Processing**

Data Collection Process

(1) Actual Operation Data: Sensor readings, data transmission logs, fault occurrence times, maintenance records, etc., are collected in real time through the on-site deployed detection system and automatically stored in chronological order.

(2) Simulated Experiment Data: In the laboratory-built simulated water supply system, preset faults (such as sensor short circuits and communication link interruptions) are artificially triggered, and the fault trigger time, system response behavior, repair operation steps, and recovery time are synchronously recorded.

Data Preprocessing Rules

(1) Denoising Processing: A filtering algorithm is used to eliminate extreme outliers caused by environmental interference (e.g., invalid data generated by sensor transient faults).

(2) Missing Value Processing: Linear interpolation method is adopted to supplement a small amount of missing data to ensure data continuity.

(3) Indicator Calculation Standards:

System Reliability = (Normal Operation Time / Total Monitoring Time) × 100%;

MTBF = Total Cumulative Fault-Free Operation Time / Number of Fault Occurrences;

MTTR = Total Cumulative Fault Repair Time / Number of Fault Occurrences;

Failure Rate = Number of Fault Occurrences / Total Monitoring Time.

**V. Explanation of Data Availability**

This document contains all core raw data of the paper’s experiments. The data are true and complete, and can be used to repeatedly verify the paper’s conclusions.

The data have undergone de-identification processing: Identifiable information such as specific pipe network point names, unique equipment numbers, and accurate geographic coordinates has been removed, with no risk of sensitive information leakage.

The data format is suitable for academic research reproduction: All indicators are marked with units and calculation logic, and the table data can be directly imported into Excel/SPSS for secondary analysis.
